# Supplementary material for: The Effects of Roundup™ on Benthic Microbial Assemblages
Source: MDPI journal article supplement (doi:10.3390/ecologies3040041), 2022-11-24
Supplement: s1 [file s1]

Archive with 1 entries (1 files):
- ecologies-1994198-supplementary.pdf
