# Supplementary figures and images for: The Effects of Roundup™ on Benthic Microbial Assemblages
Source: MDPI journal article supplement (doi:10.3390/ecologies3040041), 2022-11-24

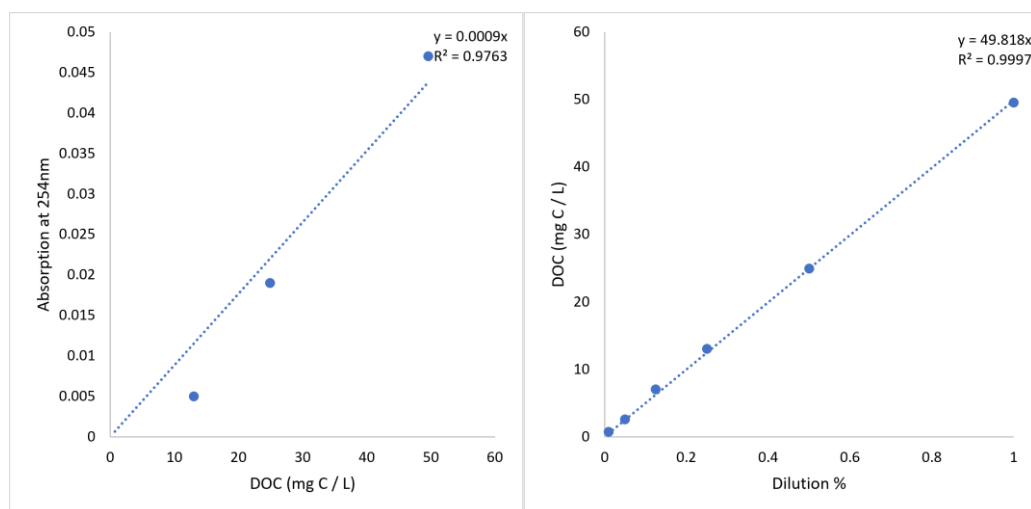

**Figure S1.** Calibration curve used to transform spectrophotometric absorbances to DOC mg/L.

Supplement: s1 [file s1]
